# Supplementary material
Source: HighWire-hosted journal article supplement (http://gut.bmjjournals.com/highwire/filestream/193032/field_highwire_adjunct_files/7/Tsilingiri_et._al._Sup._Fig._7.pdf)
Supplement: Tsilingiri_et._al._Sup._Fig._7.pdf [file Tsilingiri_et._al._Sup._Fig._7.pdf]

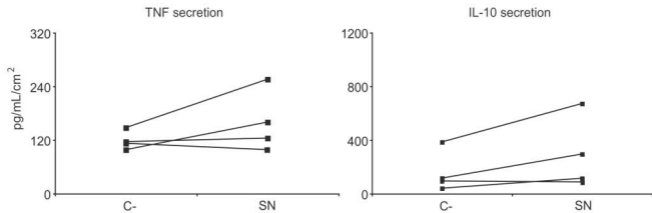

Suppl. Fig. 7: *Lactobacillus paracasei* supernatant alone does not significantly affect cytokine secretion in healthy tissues. TNF (left) and IL-10 (right) secretion from culture supernatants obtained from the basolateral side of healthy samples were measured by CBA.
